# Supplementary material for: Catalytically inactive receptor tyrosine kinase PTK7 activates FGFR1 independent of FGF
Source: PubMed Central journal article supplement — FASEB J. 2019 Sep 18;33(11):12960–71. doi: 10.1096/fj.201900932R (PMC6902674; doi:10.1096/fj.201900932r), 2019-09-18
Supplement: fj.201900932R.sd1.pdf [file fj.201900932R.sd1.pdf]

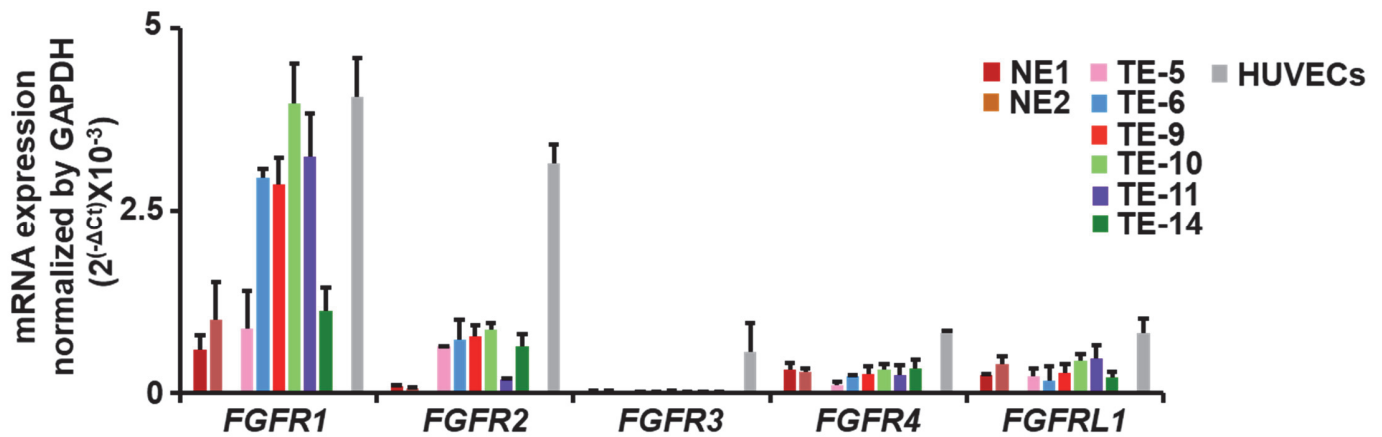

**Supplemental Figure S1. mRNA levels of FGFR members in the normal esophageal epithelial and ESCC cell lines.**

mRNA levels of FGFR1, FGFR2, FGFR3, FGFR4, and FGFR1 were determined by real-time RT-PCR in the normal esophageal epithelial (NE1 and NE2) and ESCC (TE-5, TE-6, TE-9, TE-10, TE-11, and TE-14) cell lines. Each bar represents the mean  $\pm$  standard deviation from three independent experiments. Human umbilical vein endothelial cells (HUVECs) were used as a positive control.

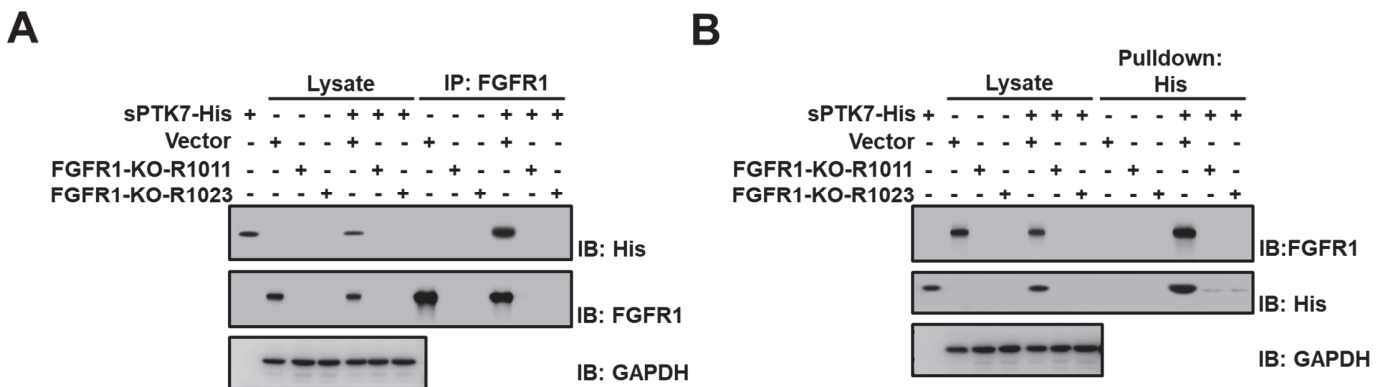

**Supplemental Figure S2. Binding analysis between extracellular domain of PTK7 and FGFR1 in ESCC TE-10 cells.**

Western blot analysis following co-immunoprecipitation of sPTK7-His with FGFR1 in FGFR1 knockout (FGFR1-KO-R1011 and R1023) TE-10 cells (A) or following pull-down of sPTK7-His with Ni<sup>2+</sup>-NTA agarose (B). An empty vector served as the negative control and GAPDH served as the loading control for the total cell lysates.
